# Supplementary material for: Silica Nanospheres Coated Silver Islands as an Effective Opto-Plasmonic SERS Active Platform for Rapid and Sensitive Detection of Prostate Cancer Biomarkers
Source: MDPI journal article supplement (doi:10.3390/molecules27227821), 2022-11-13
Supplement: s1 [file s1]

## **Supplementary Materials**

### **Silica Nanospheres Coated Silver Islands as an Effective opto-plasmonic SERS Active Platform for Rapid and Sensitive Detection of Prostate Cancer Biomarkers**

Anamika Pandey<sup>†</sup>, Subhankar Sarkar<sup>#</sup>, Sumit Kumar Pandey<sup>†</sup> and Anchal Srivastava<sup>†\*</sup>

<sup>†</sup>Department of Physics, Institute of Science, Banaras Hindu University, Varanasi-221005, India

<sup>#</sup>School of Computational and Integrative Sciences, Jawaharlal Nehru University, New Delhi-110067, India

\*Corresponding author

Email: [anchalbhu@gmail.com](mailto:anchalbhu@gmail.com), [anchal@bhu.ac.in](mailto:anchal@bhu.ac.in)

Ph.: +91-9453203122

## Synthesis of SiO<sub>2</sub> nanospheres

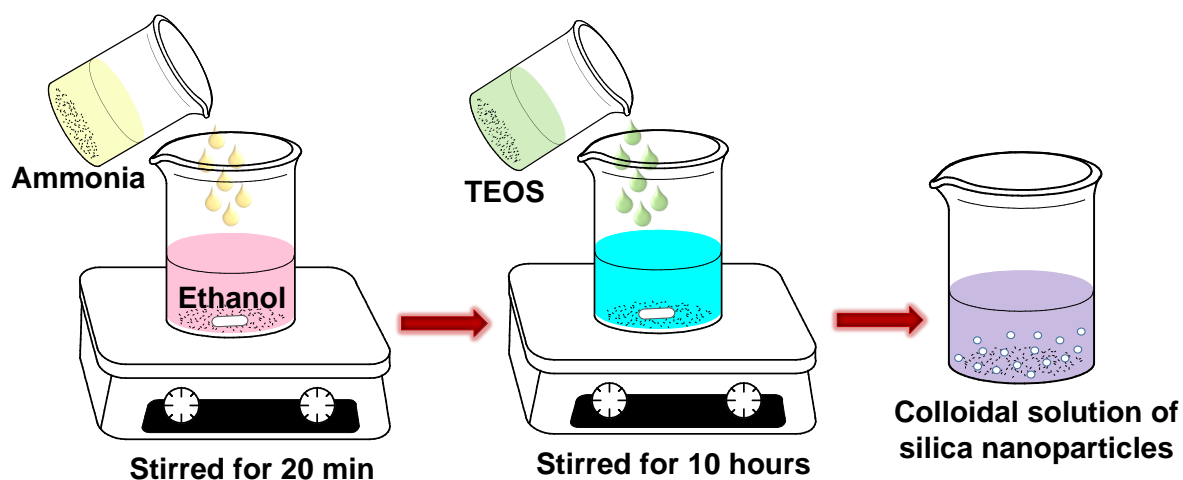

**Figure S1:** Schematic procedure for the synthesis of silica nanospheres *via* Stober's method.

## Fabrication of SERS substrate

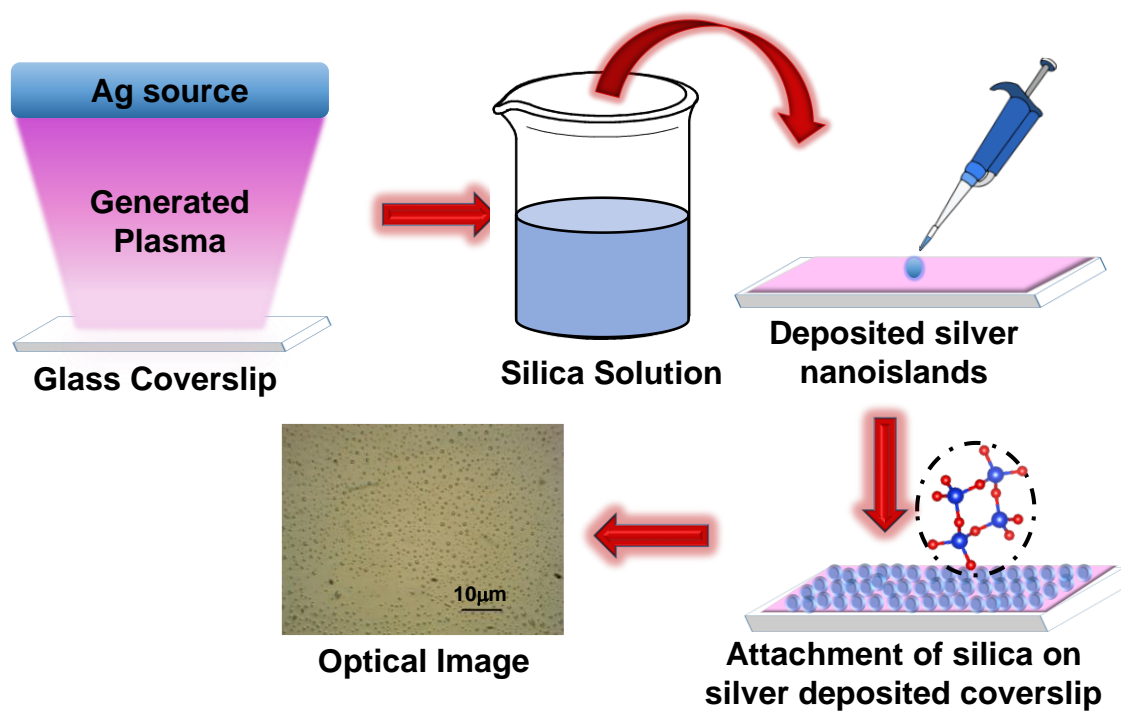

**Figure S2:** Schematic illustration of the fabrication of SERS substrate with the aid of RF sputtering.

## SERS measurements

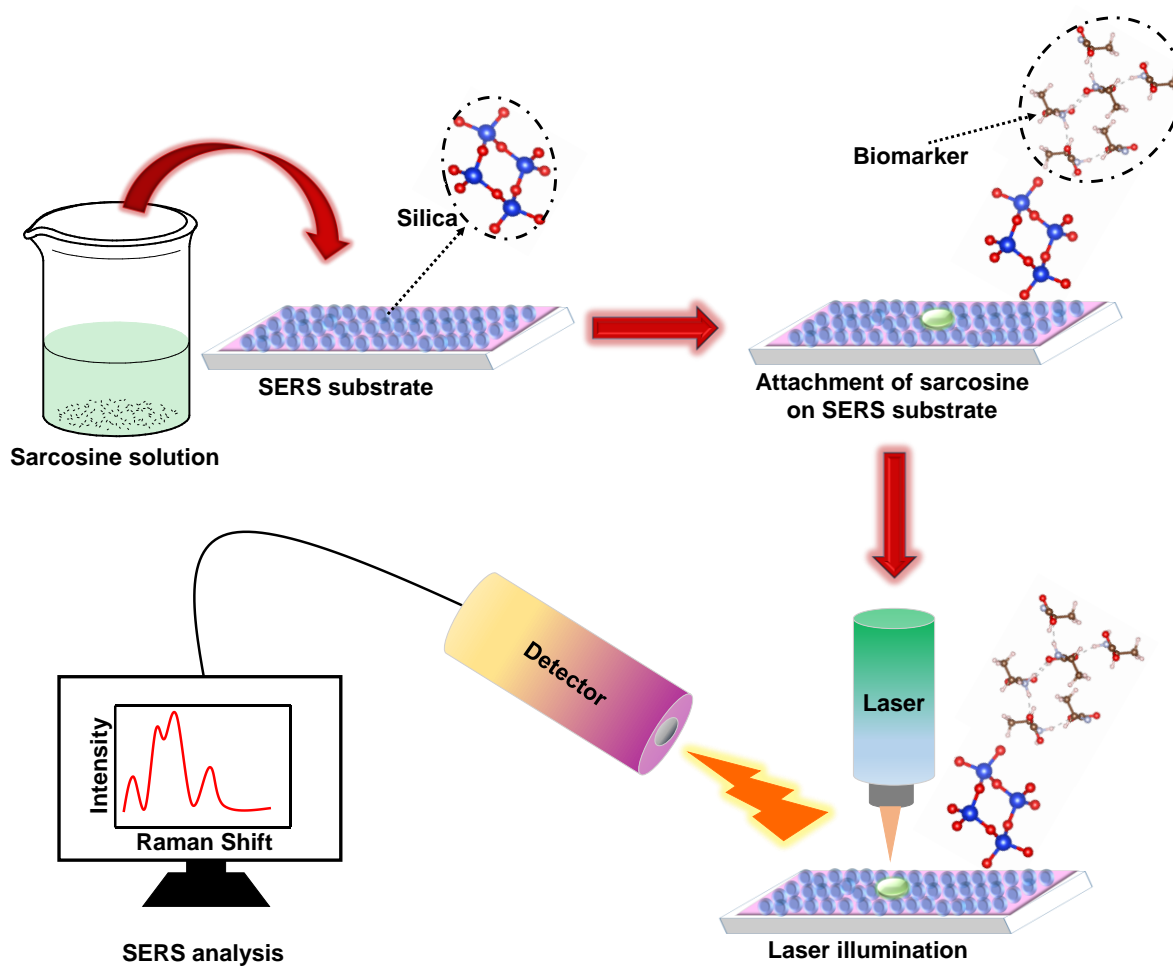

**Figure S3:** Schematic illustration of SERS analysis of sarcosine.

## UV-vis absorption spectra of silica nanospheres and band gap calculation

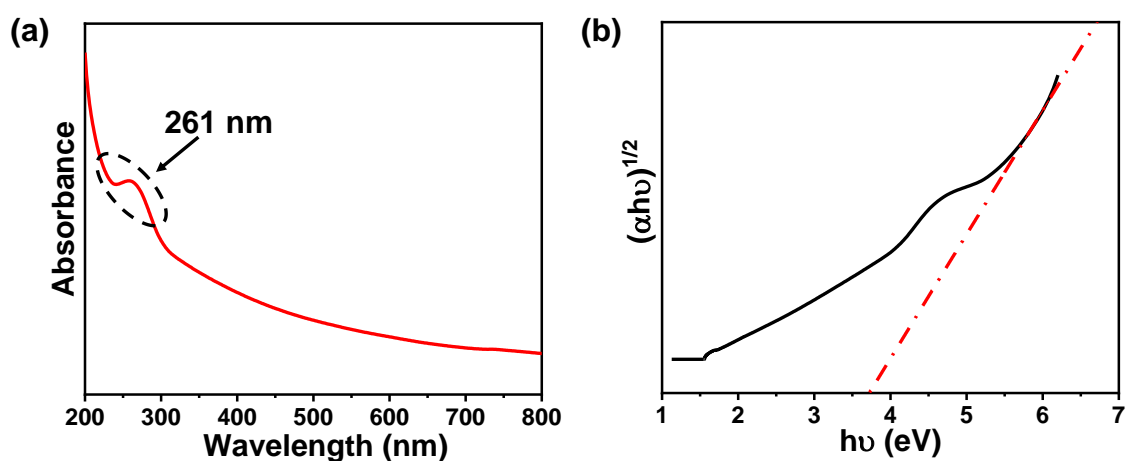

**Figure S4:** (a) UV-vis absorption spectra of as-synthesized SiO<sub>2</sub> nanospheres. (b) the band gap estimation of synthesized SiO<sub>2</sub> nanoparticles using Tauc's plot.

#### AFM 3D topography of silver nano-islands and silica nanospheres decorated silver nano-islands

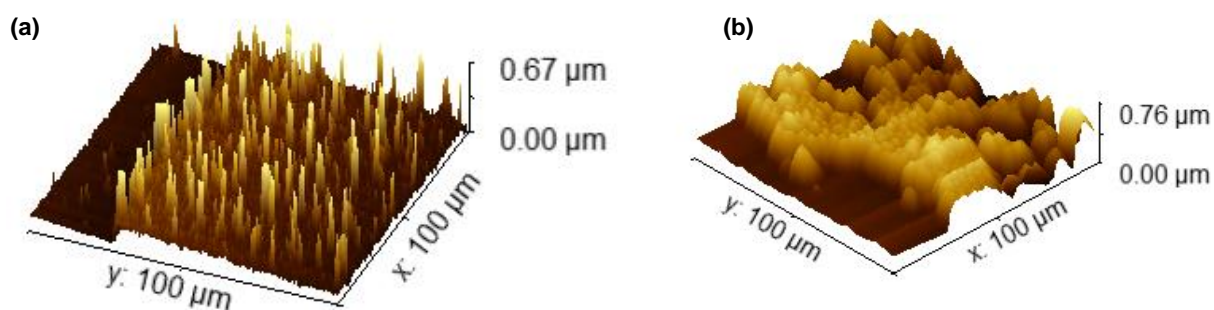

**Figure S5:** (a) 3D topography of silver nano-islands. (b) silica nanospheres decorated silver nano-islands.

#### Raman spectra of pure bulk sarcosine powder

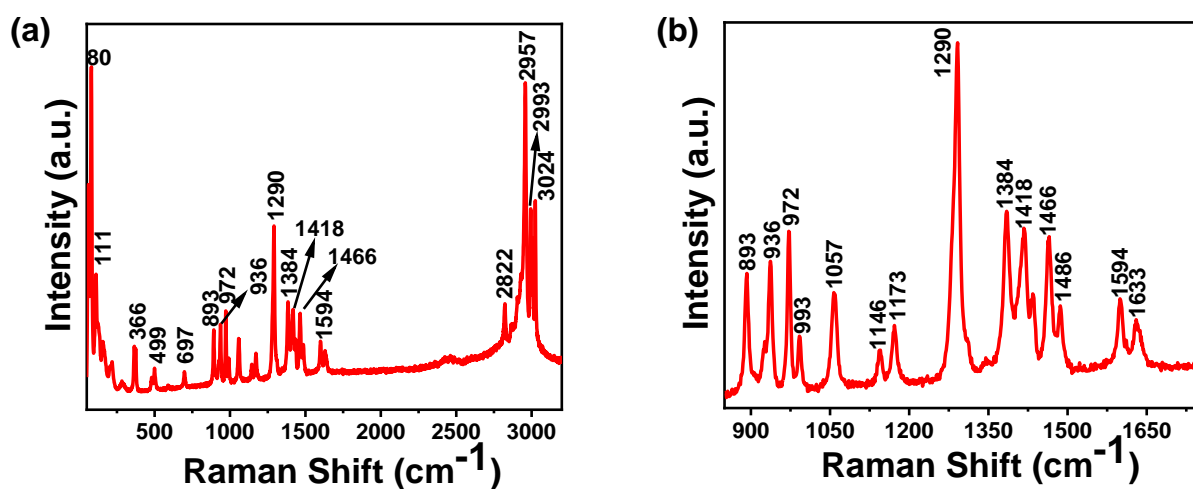

**Figure S6:** (a) Raman spectra of pure bulk sarcosine powder. (b) Raman spectra of pure bulk sarcosine powder within the range of 850  $\text{cm}^{-1}$  to 1750  $\text{cm}^{-1}$

**Table S1:** The chemical structure and various vibrational Raman bands of the prostate cancer biomarker *viz* sarcosine.

| Peak Position ( $\text{cm}^{-1}$ ) | Assignment                                                        | Relative Intensities (a.u.) |
|------------------------------------|-------------------------------------------------------------------|-----------------------------|
| 3024                               | $\text{CH}_3$ stretching (asymmetric)                             | 8186                        |
| 2993                               | $\text{CH}_2$ stretching (symmetric)                              | 7919                        |
| 2957                               | $\text{CH}_2$ stretching (symmetric)                              | 12767                       |
| 2822                               | $\text{CH}_3$ stretching (symmetric)                              | 4191                        |
| 1633                               | $\text{NH}_2$ deformation, $\text{C}=\text{O}$ stretching         | 2315                        |
| 1594                               | $\text{COO}^-$ stretching (asymmetric), $\text{NH}_2$ deformation | 2674                        |

|                                                                                   |      |                                                                          |      |
|-----------------------------------------------------------------------------------|------|--------------------------------------------------------------------------|------|
| 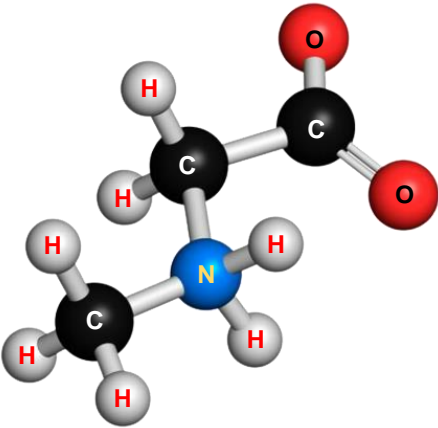 | 1486 | CH <sub>2</sub> rocking and deformation                                  | 2579 |
|                                                                                   | 1466 | CH <sub>3</sub> asymmetric in-plane bending, CH <sub>2</sub> deformation | 3771 |
|                                                                                   | 1418 | COO <sup>-</sup> stretching (symmetric), CH <sub>2</sub> deformation     | 3919 |
|                                                                                   | 1384 | CH <sub>3</sub> symmetric in-plane bending, CH <sub>2</sub> deformation  | 4197 |
|                                                                                   | 1290 | CC stretching                                                            | 7166 |
|                                                                                   | 1173 | NH <sub>2</sub> rocking                                                  | 2206 |
|                                                                                   | 1057 | CO stretching                                                            | 2803 |
|                                                                                   | 972  | CH <sub>2</sub> out-of-plane bending                                     | 3860 |
|                                                                                   | 936  | COO <sup>-</sup> deformation, and CH <sub>2</sub> rocking                | 3336 |
|                                                                                   | 893  | CO stretching, CC stretching                                             | 3119 |
|                                                                                   | 697  | COO <sup>-</sup> deformation                                             | 1536 |
|                                                                                   | 499  | COO <sup>-</sup> rocking, C-N deformation                                | 1671 |
|                                                                                   | 366  | CH <sub>2</sub> torsion                                                  | 2495 |

**Optical images of the SERS substrate before and after the Raman experiment**

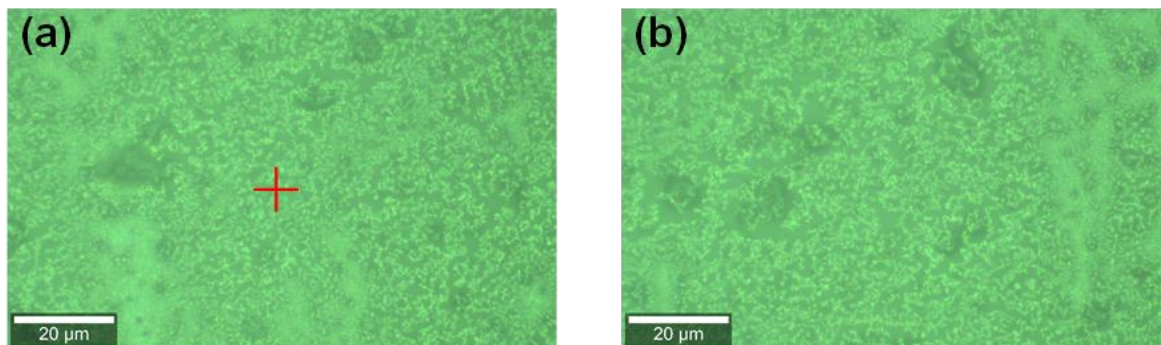

**Figure S7:** Optical images of SERS substrate (a) before Raman experiment (b) after Raman experiment.

**Raman spectrum of prepared and used SiO<sub>2</sub>@Ag SERS substrate**

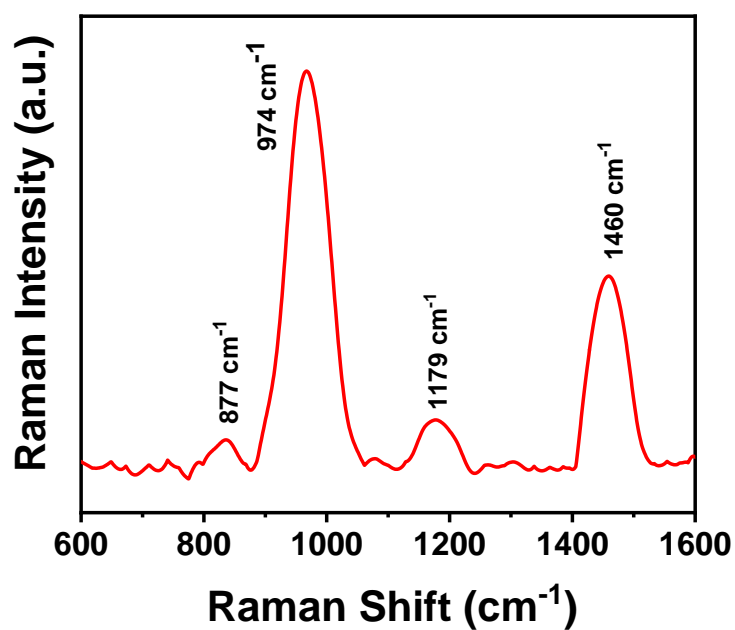

**Figure S8:** Raman spectrum of prepared and used SiO<sub>2</sub>@Ag SERS substrate. The Raman spectrum shows peaks at 877 cm<sup>-1</sup> and 974 cm<sup>-1</sup> which corresponds to SiO<sub>2</sub> nanospheres. The peaks at 1179 cm<sup>-1</sup> and 1460 cm<sup>-1</sup> correspond to Ag nano-islands.

### Calculation of limit of detection (LOD)

LOD of as fabricated SERS substrate has been calculated using the equation (1) given below

$$\text{LOD} = 3.3 \times (\text{SD of intercept/slope}) \quad (1)$$

SD (standard deviation) of intercept can be calculated by using the formula given below in equation (2):

$$\text{SD of intercept} = \text{SE (standard error) of intercept} \times \sqrt{N} \quad (2)$$

here, the value of SE of intercept is 9.847 which has been obtained using the calibration curve.

N is no. of the sample, i.e., 5. So, SD can be calculated as:

$$\begin{aligned} \text{SD of intercept} &= 9.847 \times \sqrt{5} \\ &= 22.017 \end{aligned}$$

From the calibration curve, the value of slope = 41.182

By substituting the values of SD of intercept and slope in equation (1), LOD can be calculated as:

$$\begin{aligned} \text{LOD} &= 3.3 \times (22.017/41.182) \\ &= 3.3 \times 0.534 \\ &= 1.76 \text{ nM} \end{aligned}$$

Hence, the LOD is found to be 1.76 nM.
